# Supplementary material for: Process Characterization of Polyvinyl Acetate Emulsions Applying Inline Photon Density Wave Spectroscopy at High Solid Contents
Source: Polymers (Basel). 2021 Feb 23;13(4):669. doi: 10.3390/polym13040669 (PMC7926705; doi:10.3390/polym13040669)
Supplement: Supplementary file 1 [file polymers-13-00669-s001.pdf]

## Article

# Process Characterization of Polyvinyl Acetate Emulsions Applying Inline Photon Density Wave Spectroscopy at High Solid Contents

Stephanie Schlappa <sup>1,\*</sup>, Lee Josephine Brenker <sup>1</sup>, Lena Bressel <sup>1</sup>, Roland Hass <sup>1,2</sup> and Marvin Münzberg <sup>1</sup>

<sup>1</sup> Department of Physical Chemistry, innoFSPEC, University of Potsdam, Am Muehlenberg 3, 14476 Potsdam, Germany; josie.brenker@googlemail.com (L.J.B.); bressel@uni-potsdam.de (L.B.); rh@pdw-analytics.de (R.H.); marvin.muenzberg@uni-potsdam.de (M.M.)

<sup>2</sup> PDW Analytics GmbH, Geiselbergstraße 4, 14476 Potsdam, Germany; rh@pdw-analytics.de

\* Correspondence: stephanie.schlappa@uni-potsdam.de; Tel.: 0049 331 977 206225

**Citation:** Schlappa, S.; Brenker, L.J.; Bressel, L.; Hass, R.; Münzberg, M. Process Characterization of Polyvinyl Acetate Emulsions Applying Inline Photon Density Wave Spectroscopy at High Solid Contents. *Polymers* **2021**, *13*, 669. <https://doi.org/10.3390/polym13040669>

Academic Editor: Maria Paulis  
Received: 30 January 2021  
Accepted: 19 February 2021  
Published: 23 February 2021

**Publisher's Note:** MDPI stays neutral with regard to jurisdictional claims in published maps and institutional affiliations.

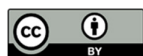

**Copyright:** © 2021 by the authors. Licensee MDPI, Basel, Switzerland. This article is an open access article distributed under the terms and conditions of the Creative Commons Attribution (CC BY) license (<http://creativecommons.org/licenses/by/4.0/>).

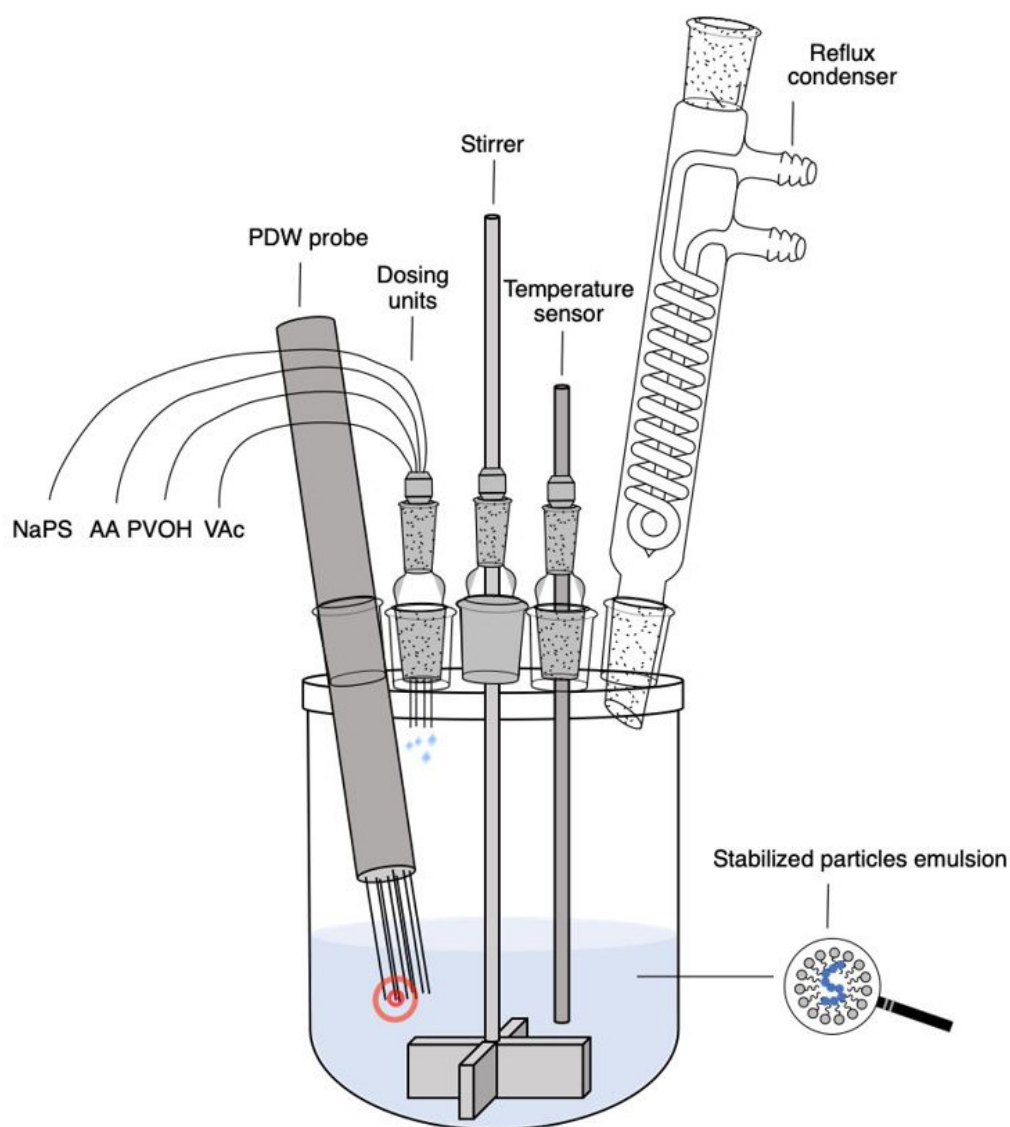

**Figure S1.** Schematic description of the reactor Set-Up. 1 L automated Lab reactor equipped with automated temperature control, stirring control, dosing control, overhead reflux condenser, and  $N_2$  purging. The PDW inline probe is directly inserted into the reactor via an inlet port.

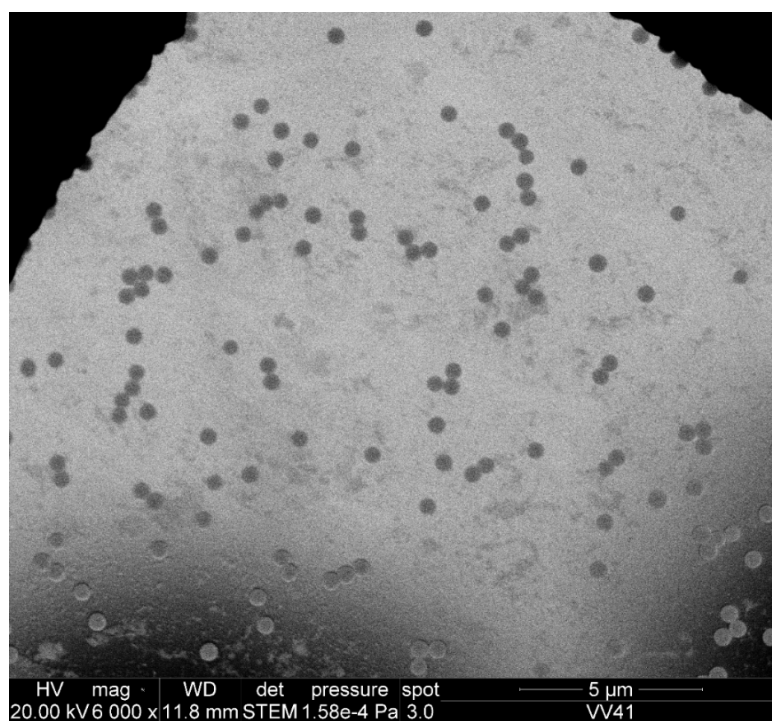

Figure S2. Electron microscopy picture of particles produced during synthesis VAc\_1.5.

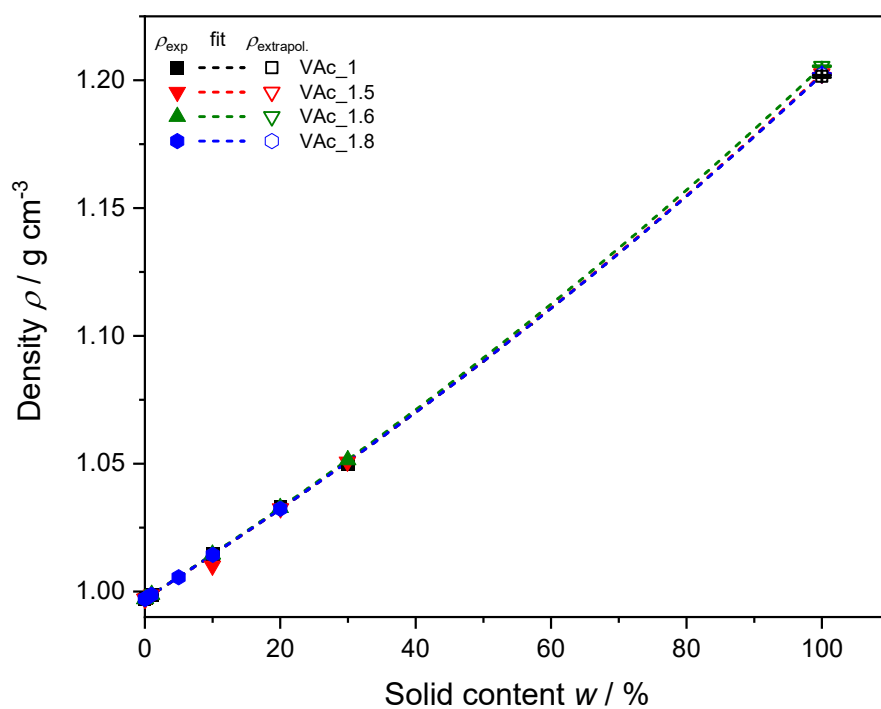

Figure S1 Density of the dispersions of VAc\_1, VAc\_1.5, VAc\_1.6, and VAc\_1.8 measured with a densitometer at different concentrations (solid symbols) as well as extrapolated density of the particles (open symbols).

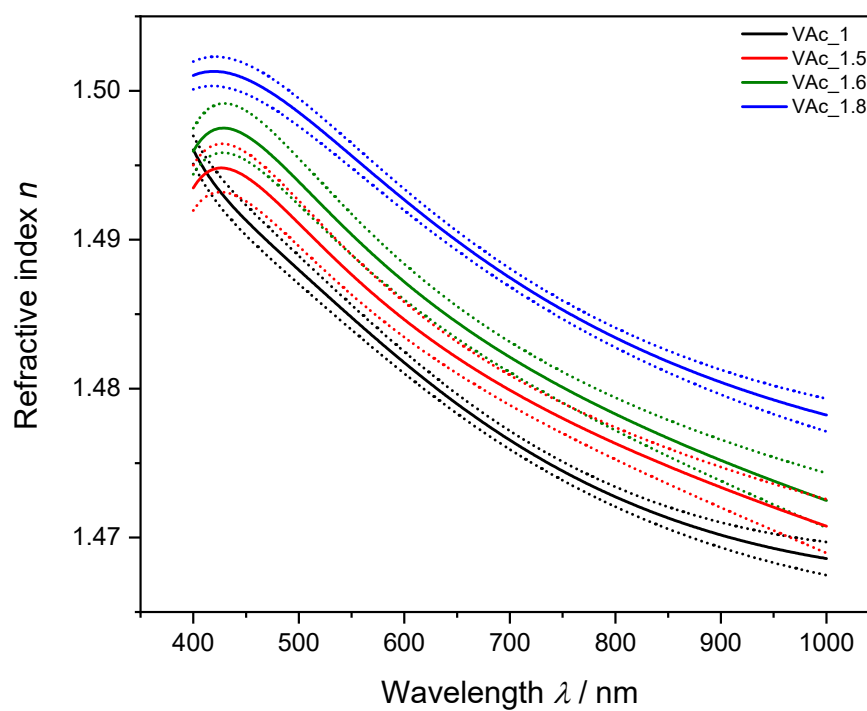

**Figure S4.** Refractive index of the particles from syntheses VAc\_1, VAc\_1.5, VAc\_1.6, and VAc\_1.8 extrapolated from values of a concentration series of the dispersions measured with a refractometer at seven wavelengths and inter- and extrapolated to wavelengths between 400 nm and 1000 nm. Confidence intervals with +95% and −95% are shown as dashed lines.
